# Supplementary material for: Driving, work, wound care and rehabilitation after carpal tunnel release: Consensus recommendations from a UK Delphi study
Source: PubMed Central journal article supplement — Hand Ther. 2022 Jul 15;27(3):71–82. doi: 10.1177/17589983221113870 (PMC10588429; doi:10.1177/17589983221113870), 2022-07-15
Supplement: sj-pdf-1-hth-10.1177_17589983221113870.pdf [file sj-pdf-1-hth-10.1177_17589983221113870.pdf]

**SUPPLEMENTARY FILE 1**

Recommendations for the Conducting and Reporting of Delphi Studies (CREDES)

Adapted from: Jünger S, Payne SA, Brine J, Radbruch L, Brearley SG. Guidance on Conducting and REporting DELphi Studies (CREDES) in palliative care: Recommendations based on a methodological systematic review. Palliat Med. 2017;31(8):684-706.

| CREDES Item                                                                                                                                                                                                                                                                                                                                                                                                                                                                                                                                                                                                                                                                                                                                                                                                                                                                                                                                                                                                                                                                                                                                                                                                                                                                                                                                                                                                                                                                  | Location in text                                                                                                                                                                                                                                                                                          |
|------------------------------------------------------------------------------------------------------------------------------------------------------------------------------------------------------------------------------------------------------------------------------------------------------------------------------------------------------------------------------------------------------------------------------------------------------------------------------------------------------------------------------------------------------------------------------------------------------------------------------------------------------------------------------------------------------------------------------------------------------------------------------------------------------------------------------------------------------------------------------------------------------------------------------------------------------------------------------------------------------------------------------------------------------------------------------------------------------------------------------------------------------------------------------------------------------------------------------------------------------------------------------------------------------------------------------------------------------------------------------------------------------------------------------------------------------------------------------|-----------------------------------------------------------------------------------------------------------------------------------------------------------------------------------------------------------------------------------------------------------------------------------------------------------|
| <p><b>Rationale for the choice of Delphi (or other consensus generating technique)</b><br/>                     Justification: A clearly defined purpose of the study and a discussion of the appropriateness of the use of the Delphi technique.</p>                                                                                                                                                                                                                                                                                                                                                                                                                                                                                                                                                                                                                                                                                                                                                                                                                                                                                                                                                                                                                                                                                                                                                                                                                        | Introduction (p2)                                                                                                                                                                                                                                                                                         |
| <p><b>Planning and design</b><br/>                     Process: Methods and analyses employed need to be comprehensible and any modification should be justified and applied systematically.<br/>                     Definition of consensus: A priori criteria for consensus should be defined, including: how to proceed with items or topics in the next round; the required threshold to terminate the Delphi process; procedures to follow when consensus is not reached.</p>                                                                                                                                                                                                                                                                                                                                                                                                                                                                                                                                                                                                                                                                                                                                                                                                                                                                                                                                                                                          | Methods (p4-5)<br>Methods, Delphi design (p4)<br>Results, Delphi panel (p5-6)                                                                                                                                                                                                                             |
| <p><b>Study conduct</b><br/>                     Information input: All material provided to the expert panel should be carefully reviewed and piloted prior to use.<br/>                     Prevention of bias: Independent researchers should be involved if any conflicts of interest.<br/>                     Interpretation and processing of results: Consensus does not necessarily imply the correct answer/judgement. Non-consensus as stable disagreement should be reported.<br/>                     External validation: Recommended to have the final draft of resulting guidance reviewed and approved by an external board before publication and dissemination.</p>                                                                                                                                                                                                                                                                                                                                                                                                                                                                                                                                                                                                                                                                                                                                                                                       | Methods (p4-5)<br>Conflicts of interest (declarations)<br>Results (p5-10)<br>Methods, patient and public involvement (p5)<br>Results, Delphi panel (p5-6)                                                                                                                                                 |
| <p><b>Reporting</b><br/>                     Purpose and rationale: Purpose clearly defined and appropriate. Rationale for Delphi as the most suitable method to achieve research aim.<br/>                     Expert panel: Criteria for selection of experts and transparent information on recruitment, socio-demographics and response rates for each iteration.<br/>                     Description of the methods: Including preparatory steps, how the available evidence was synthesised, piloting material, design of number of rounds, methodological decisions during the process.<br/>                     Procedure: Use a flow chart to illustrate the stages<br/>                     Definition and attainment of consensus: How was consensus achieved throughout the process, including strategies to deal with non-consensus.<br/>                     Results: Reporting of results for each round separately to show evolving consensus.<br/>                     Limitations: Includes critical reflection of potential limitations and their impact on the resulting guidance.<br/>                     Adequacy of conclusions: Conclusions should adequately reflect the outcomes of the study with a view to the scope and applicability of the resulting practice guidelines.<br/>                     Publication and dissemination: Should include endorsement of the guidance by professional associations to facilitate implementation.</p> | Introduction (p2-3)<br>Methods, Eligibility and recruitment (p4-5)<br>Results, Delphi panel (p5-6)<br>Methods (p4-5)<br>2 rounds, response rates provided in Table 1<br>Methods, Delphi design (p4)<br>Results (p5-10)<br>Discussion, Limitations (p13-14)<br>Conclusions (p13)<br>Funding (declarations) |
